# Supplementary material
Source: Springer Nature journal article supplement (https://www.springermedizin.de/resource/supplementary/12904_2013_160_MOESM5_ESM.pdf/9517656)

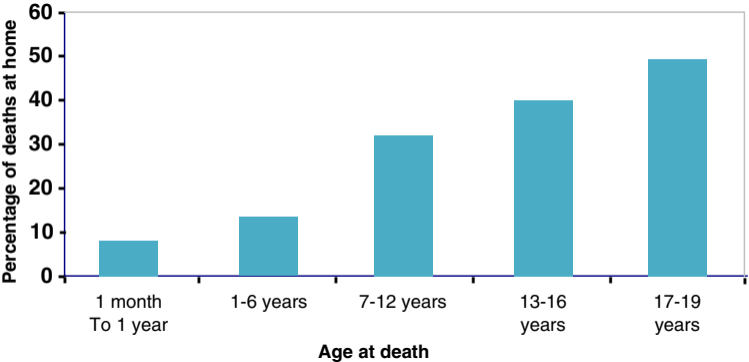

Supplement: MOESM5 [file 9517656]
